# Supplementary figures and images for: Overcoming multidrug resistance by a singlet oxygen releasing camptothecin-endoperoxide
Source: Royal Society of Chemistry journal article supplement (doi:10.1039/d4cc03576c), 2024-01-01

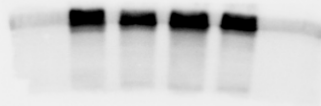

Supplement: d4cc03576c2.pdf [file d4cc03576c2.pdf]

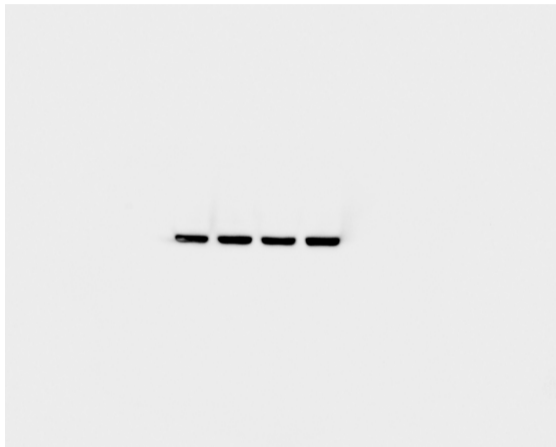

Supplement: d4cc03576c3.pdf [file d4cc03576c3.pdf]
